# Supplementary material for: Study on H2S Occurrence in Low Sulfur Coal Seams
Source: Hindawi journal article supplement (doi:10.1155/2022/5455101), 2022-01-01
Supplement: f1 [file 5455101.f1.docx]

**Supplement 1 The changes of temperature, pressure and H2S concentration in the experiment of dry coal adsorbing different concentrations of H2S**

**Table S1.1 Variation of temperature and pressure in the adsorption chamber at different equilibrium time**

| Time/h | Temp/K | | | | | Pressure/Pa | | | | |
| --- | --- | --- | --- | --- | --- | --- | --- | --- | --- | --- |
| SP-52 | SP-96 | SP-260 | SP-465 | SP-850 | SP-52 | SP-96 | SP-260 | SP-465 | SP-850 |
| 0 | 289.65 | 291.35 | 290.45 | 290.25 | 289.55 | 132225 | 132425 | 132425 | 132125 | 132225 |
| 2 | 290.45 | 293.35 | 289.25 | 289.15 | 288.85 | 130325 | 130825 | 129625 | 129425 | 129325 |
| 4 | 292.05 | 294.45 | 289.85 | 289.35 | 289.45 | 129125 | 129925 | 128025 | 127525 | 127425 |
| 6 | 292.45 | 294.45 | 290.35 | 290.05 | 289.65 | 127425 | 128325 | 126525 | 126125 | 126525 |
| 8 | 292.55 | 293.95 | 290.15 | 289.85 | 289.15 | 125525 | 126625 | 125125 | 125125 | 125325 |
| 10 | 292.55 | 292.65 | 289.35 | 289.25 | 289.05 | 123525 | 124825 | 123525 | 123925 | 123925 |
| 12 | 292.45 | 294.25 | 288.25 | 289.15 | 288.75 | 121525 | 122925 | 121425 | 122425 | 122425 |
| 14 | 292.65 | 293.35 | 287.95 | 289.15 | 289.55 | 119625 | 121125 | 119925 | 121325 | 121025 |
| 16 | 292.65 | 292.95 | 286.65 | 288.95 | 288.45 | 117525 | 117125 | 117825 | 119725 | 119825 |
| 18 | 292.35 | 291.35 | 287.45 | 291.25 | 290.15 | 115325 | 113225 | 116525 | 119025 | 119125 |
| 20 | 292.15 | 291.05 | 290.15 | 291.65 | 290.65 | 113325 | 109225 | 115625 | 118525 | 118625 |
| 22 | 292.05 | 291.15 | 290.95 | 291.55 | 290.65 | 109625 | 106925 | 114725 | 117825 | 117425 |
| 24 | 291.65 | 291.15 | 290.65 | 291.85 | 290.55 | 105625 | 105225 | 113625 | 116825 | 116225 |

**Table S1.2 Variation of H2S concentration in the adsorption chamber at different equilibrium time**

| Time/h | H2S concentration /ppm | | | | |
| --- | --- | --- | --- | --- | --- |
| SP-52 | SP-96 | SP-260 | SP-465 | SP-850 |
| 0 | 52 | 96 | 260 | 465 | 850 |
| 2 | 35 | 75 | 220 | 388 | 626 |
| 4 | 30 | 66 | 206 | 365 | 552 |
| 6 | 26 | 57 | 192 | 340 | 495 |
| 8 | 23 | 52 | 180 | 317 | 445 |
| 10 | 20 | 46 | 168 | 304 | 414 |
| 12 | 17 | 40 | 163 | 293 | 393 |
| 14 | 15 | 35 | 156 | 278 | 382 |
| 16 | 13 | 34 | 147 | 268 | 378 |
| 18 | 11 | 32 | 142 | 259 | 376 |
| 20 | 9 | 30 | 141 | 246 | 363 |
| 22 | 8 | 28 | 139 | 241 | 362 |
| 24 | 8 | 28 | 139 | 242 | 361 |

**Supplement 2 Changes of Temperature, Pressure and H2S Concentration in Coal Adsorption H2S Experiment with Different Moisture Content**

**Table S2.1 Variation of temperature and pressure with time in adsorption chamber for coal samples with different water contents**

| Time/h | Temp/K | | | | | | Pressure/Pa | | | | | |
| --- | --- | --- | --- | --- | --- | --- | --- | --- | --- | --- | --- | --- |
| SP-0% | SP-3% | SP-5% | SP-7% | SP-10% | SP-20% | SP-0% | SP-3% | SP-5% | SP-7% | SP-10% | SP-20% |
| 0 | 286.75 | 289.55 | 289.85 | 289.85 | 290.85 | 289.55 | 132225 | 132525 | 132825 | 132425 | 132425 | 132425 |
| 2 | 289.35 | 288.85 | 289.15 | 290.95 | 290.65 | 289.35 | 129925 | 129225 | 129725 | 130025 | 130025 | 130025 |
| 4 | 289.85 | 289.45 | 290.35 | 291.45 | 290.45 | 289.15 | 128925 | 128025 | 128625 | 129325 | 129025 | 129225 |
| 6 | 289.75 | 289.65 | 290.55 | 289.95 | 289.95 | 288.65 | 127625 | 126825 | 127525 | 128125 | 128025 | 128325 |
| 8 | 289.55 | 289.15 | 290.75 | 290.75 | 290.45 | 289.15 | 127625 | 125225 | 127225 | 127125 | 127025 | 127325 |
| 10 | 288.65 | 289.05 | 289.65 | 290.95 | 290.65 | 289.35 | 126625 | 123425 | 126125 | 126425 | 126125 | 126425 |
| 12 | 287.95 | 288.75 | 289.85 | 290.45 | 290.45 | 289.15 | 125325 | 121525 | 125225 | 125525 | 125425 | 125525 |
| 14 | 288.95 | 289.55 | 289.85 | 290.15 | 290.25 | 288.95 | 124325 | 119925 | 124025 | 124125 | 124025 | 124025 |
| 16 | 289.85 | 288.45 | 289.95 | 289.65 | 289.65 | 288.35 | 123425 | 118625 | 123125 | 122925 | 122625 | 122825 |
| 18 | 289.05 | 290.15 | 290.75 | 289.75 | 289.75 | 288.45 | 122525 | 117625 | 122325 | 122125 | 121925 | 122225 |
| 20 | 288.75 | 290.65 | 290.75 | 289.65 | 289.55 | 288.25 | 121625 | 116925 | 121725 | 121325 | 121125 | 121425 |
| 22 | 288.45 | 290.65 | 289.75 | 289.75 | 289.55 | 288.25 | 120725 | 116125 | 120725 | 120425 | 120125 | 120425 |
| 24 | 288.45 | 290.55 | 289.85 | 289.75 | 289.55 | 288.25 | 119925 | 115125 | 119825 | 119525 | 119425 | 119525 |

**Table S2.2 Variation of H2S concentration with time in adsorption chamber of coal samples with different water contents**

| Time/h | H2S concentration /ppm | | | | | |
| --- | --- | --- | --- | --- | --- | --- |
| SP-0% | SP-3% | SP-5% | SP-7% | SP-10% | SP-20% |
| 0 | 750 | 750 | 750 | 750 | 750 | 750 |
| 2 | 626 | 565 | 492 | 430 | 392 | 301 |
| 4 | 578 | 527 | 457 | 401 | 368 | 265 |
| 6 | 550 | 489 | 428 | 378 | 343 | 248 |
| 8 | 520 | 463 | 403 | 360 | 330 | 226 |
| 10 | 492 | 432 | 382 | 342 | 314 | 212 |
| 12 | 469 | 415 | 362 | 326 | 303 | 198 |
| 14 | 444 | 397 | 355 | 318 | 293 | 183 |
| 16 | 434 | 380 | 349 | 317 | 285 | 173 |
| 18 | 422 | 372 | 343 | 317 | 279 | 162 |
| 20 | 418 | 366 | 341 | 316 | 278 | 155 |
| 22 | 417 | 361 | 341 | 316 | 278 | 155 |
| 24 | 417 | 361 | 341 | 316 | 278 | 155 |
